# Supplementary material for: Apoptosis-resistant megakaryocytes produce large and hyperreactive platelets in response to radiation injury
Source: PubMed Central journal article supplement (PMC10729570; doi:10.1186/s40779-023-00499-z), 2023-12-19
Supplement: 40779_2023_499_MOESM1_ESM.pdf [file 40779_2023_499_MOESM1_ESM.pdf]

**Table S1** Antibodies used in Western blotting (WB), immunofluorescence, and flow cytometry

| <b>Antibody</b>                                             | <b>Origin</b>    | <b>Catalog number</b> | <b>Assay</b> |
|-------------------------------------------------------------|------------------|-----------------------|--------------|
| CD41a monoclonal antibody (eBioMWRReg30 (MWRReg30)), APC    | eBioscience      | Cat# 17-0411-82       | FC           |
| CD42d monoclonal antibody (1C2), APC                        | eBioscience      | Cat# 17-0421-82       | FC           |
| CD42d monoclonal antibody (1C2), PE                         | eBioscience      | Cat# 12-0421-82       | FC           |
| CD41a monoclonal antibody [eBioMWRReg30 (MWRReg30)], FITC   | eBioscience      | Cat# 11-0411-85       | FC           |
| CD41a monoclonal antibody [eBioMWRReg30 (MWRReg30)], Biotin | eBioscience      | Cat# 13-0411-82       | FC           |
| PE anti-mouse/rat CD62P (P-selectin) antibody               | Biologend        | Cat# 148306           | FC           |
| Integrin alpha IIb beta 3 (GPIIb/IIIa) activation, PE       | Emfret Analytics | Cat# M023-2           | FC           |
| Biotin mouse hematopoietic lineage cocktail                 | eBioscience      | Cat# 88-7774-75       | FC           |
| Brilliant Violet 510™ Streptavidin                          | Biologend        | Cat# 405234           | FC           |
| Ly-6A/E (Sca-1) monoclonal antibody (D7), PerCP-Cyanine5.5  | eBioscience      | Cat# 45-5981-82       | FC           |
| CD117 (c-Kit) monoclonal antibody (2B8), APC-eFluor™ 780    | eBioscience      | Cat# 47-1171-82       | FC           |
| CD150 monoclonal antibody (mShad150), PE-Cyanine7           | eBioscience      | Cat# 25-1502-82       | FC           |
| CD45 monoclonal antibody (HI30), eFluor 450                 | eBioscience      | Cat# 48-0459-42       | FC           |
| CD115 (c-fms) monoclonal antibody (AFS98), PE-Cyanine7      | eBioscience      | Cat# 25-1152-80       | FC           |
| CD11b monoclonal antibody (M1/70), APC                      | eBioscience      | Cat# 17-0112-82       | FC           |
| Ly-6G/Ly-6C (Gr-1) monoclonal antibody (RB6-8C5), PE        | eBioscience      | Cat# 12-5931-82       | FC           |
| APC anti-mouse CD80                                         | eBioscience      | Cat# 17-0801-82       | FC           |
| PerCP-Cyanine5.5 anti-mouse CD11c                           | eBioscience      | Cat# 45-0114-82       | FC           |
| Anti-human CD41 antibody, APC                               | Biologend        | Cat# 303710           | FC           |
| Anti-human CD62P (P-Selectin) antibody, PE                  | Biologend        | Cat# 304906           | FC           |

| <b>Antibody</b>                                                           | <b>Origin</b>             | <b>Catalog number</b> | <b>Assay</b> |
|---------------------------------------------------------------------------|---------------------------|-----------------------|--------------|
| Annexin V- eFluor 450 apoptosis detection kit                             | eBioscience               | Cat# 88-8006-74       | FC           |
| Bcl-xL monoclonal antibody (C.85.1)                                       | Thermo Fisher Scientific  | Cat# MA5-15142        | FC           |
| MCL1 recombinant rabbit monoclonal antibody (SI16-04)                     | Thermo Fisher Scientific  | Cat# MA5-32060        | FC           |
| BAX monoclonal antibody (6A7)                                             | Thermo Fisher Scientific  | Cat# MA5-14003        | FC           |
| BAK1 monoclonal antibody (4C2)                                            | Thermo Fisher Scientific  | Cat# MA5-36225        | FC           |
| Cleaved caspase-3 (Asp175) (D3E9) rabbit mAb (Alexa Fluor® 647 Conjugate) | Cell Signaling Technology | Cat# 9602S            | FC           |
| Alexa Fluor® 647 anti-cytochrome c antibody                               | Biolegend                 | Cat# 612310           | FC           |
| TBK1 antibody                                                             | Abcam                     | Cat# ab40676          | WB           |
| p-TBK1 (Ser172) antibody                                                  | Cell Signaling Technology | Cat# 5483             | WB, IF       |
| p-IRF3 (Ser396) antibody                                                  | Cell Signaling Technology | Cat# 29047            | WB, IF       |
| IRF3 antibody                                                             | Cell Signaling Technology | Cat# 4302             | WB           |
| p-TBK1 (Ser172) antibody (Alexa Fluor 647 Conjugate)                      | Cell Signaling Technology | Cat# 14590            | FC           |
| p-IRF3 (Ser396) antibody (Alexa Fluor 647 Conjugate)                      | Cell Signaling Technology | Cat# 10327            | FC           |
| IFN- $\beta$ antibody                                                     | Abcam                     | Cat# ab85803          | WB, IF, FC   |
| Anti-IFN- $\beta$ (EPR22186-266)                                          | Abcam                     | Cat# ab218229         | WB           |
| IFN- $\beta$ antibody (MIB-8C4.1)                                         | Santa Cruz Biotechnology  | Cat# sc-53586         | FC, IF       |
| p-STAT1 (Tyr701) antibody                                                 | Cell Signaling Technology | Cat# 9167             | WB, IF       |
| STAT1 antibody                                                            | Cell Signaling Technology | Cat# 14994            | WB           |
| p-STAT1 (Ser727) antibody (Alexa Fluor 647 Conjugate)                     | Biolegend                 | Cat# 686412           | FC           |
| Anti-GBP2 antibody                                                        | Abcam                     | Cat# ab203238         | WB           |
| GBP2 polyclonal antibody                                                  | Thermo Fisher Scientific  | Cat# PA5-112426       | FC           |

| <b>Antibody</b>                                                                 | <b>Origin</b>             | <b>Catalog number</b> | <b>Assay</b> |
|---------------------------------------------------------------------------------|---------------------------|-----------------------|--------------|
| GAPDH (D16H11) XP <sup>®</sup> Rabbit mAb                                       | Cell Signaling Technology | Cat# 5174S            | WB           |
| cGAS antibody                                                                   | Abcam                     | Cat# ab224144         | IF           |
| cGAS antibody                                                                   | Santa Cruz Biotechnology  | Cat# sc-515777        | IF           |
| Tom20 antibody                                                                  | Santa Cruz Biotechnology  | Cat# sc-17764         | IF           |
| LC3B antibody                                                                   | Novus Biologicals         | Cat# NB100-2220       | WB, IF       |
| DNA antibody                                                                    | Millipore                 | Cat# CBL186           | IF           |
| Monoclonal ANTI-Flag <sup>®</sup> M2 antibody                                   | Sigma-Aldrich             | Cat# F1804            | ChIP         |
| Goat anti-mouse IgG (H + L) cross-adsorbed secondary antibody, Alexa Fluor 488  | Thermo Fisher Scientific  | Cat# A-11001          | IF           |
| Goat anti-mouse IgG (H + L) cross-adsorbed secondary antibody, Alexa Fluor 546  | Thermo Fisher Scientific  | Cat# A-11003          | IF           |
| Goat anti-rabbit IgG (H + L) cross-adsorbed secondary antibody, Alexa Fluor 488 | Thermo Fisher Scientific  | Cat# A-11008          | IF           |
| Goat anti-rabbit IgG (H + L) cross-adsorbed secondary antibody, Alexa Fluor 546 | Thermo Fisher Scientific  | Cat# A-11010          | IF           |
| Goat anti-rabbit IgG (H + L) cross-adsorbed secondary antibody, Alexa Fluor 647 | Thermo Fisher Scientific  | Cat# A-21244          | FC           |
| Goat anti-mouse IgG (H + L) cross-adsorbed secondary Antibody, Alexa Fluor 647  | Thermo Fisher Scientific  | Cat# A-21235          | FC           |
| HRP labeled goat anti-rabbit IgG (H + L)                                        | Abcam                     | Cat# 205718           | WB           |
| HRP labeled goat anti-Mouse IgG (H + L)                                         | Abcam                     | Cat# 205719           | WB           |

*IF* immunofluorescence, *FC* flow cytometry, *ChIP* chromatin immunoprecipitation, *LC3B* microtubule-associated protein 1 light chain 3B, *TOM20* translocase of outer mitochondrial membrane 20, *cGAS* cyclic GMP-AMP synthase, *STING* stimulator of interferon genes, *TBK1* TANK-binding kinase 1, *IRF3* interferon regulatory factor 3, *IFN-β* interferon-β, *STAT1* signal transducer and activator of transcription 1, *GBP2* guanylate-binding protein 2, *GAPDH* glyceraldehyde-3-phosphate dehydrogenase, *FITC* fluorescein isothiocyanate, *PE* phycoerythrin, *APC* allophycocyanin, *PerCP* peridinin chlorophyll protein, *IgG* Allophycocyanin, *HRP* horseradish peroxidase

**Table S2** Primer sequences for mitochondrial DNA (mtDNA) and nuclear DNA (nDNA) analysis

| <b>Origin</b>    | <b>Gene</b>   | <b>Forward primer (5' - 3')</b> | <b>Reverse primer (5' - 3')</b> |
|------------------|---------------|---------------------------------|---------------------------------|
| mtDNA<br>(mouse) | <i>D-loop</i> | AATCTACCATCCTCCGTGAAACC         | TCAGTTTAGCTACCCCAAGTTAA         |
|                  | <i>Cox1</i>   | GCCCCAGATATAGCATTCCC            | G TTCATCCTGTTCTGCTCC            |
|                  | <i>ND4</i>    | AACGGATCCACAGCCGTA              | AGTCCTCGGGCCATGATT              |
| mtDNA<br>(human) | <i>ND1</i>    | CCCTAAAACCCGCCACATCT            | GAGCGATGGTGAGAGCTAAGGT          |
|                  | <i>ND2</i>    | ACCATCTTTGCAGGCACACT            | GCTTCTGTGGAACGAGGGTT            |
|                  | <i>ND4</i>    | TTCCTCCGACCCCTAACAA             | GATAAGTGGCGTTGGCTTGC            |
| nDNA<br>(human)  | <i>LINE1</i>  | AGAACGCCACAAAGATACTCCTCG        | CTCTCTTCTGGCTTGTAGGGTTTCTG      |
|                  | <i>RNA18S</i> | TGCCCTATCAACTTTCGATGGTAGTC      | TTGGATGTGGTAGCCGTTTCTCA         |

**Table S3** siRNA sequences used for human RNA interference

| <b>Gene</b>      | <b>Sense</b>           | <b>Antisense</b>      |
|------------------|------------------------|-----------------------|
| <i>cGAS</i>      | CCAACACUCGUGCAUAAUUATT | UAAUAUGCACGAGUGUUGGTT |
| <i>STING</i>     | GCAUCAAGGAUCGGGUUUATT  | UAAACCCGAUCCUUGAUGCTT |
| <i>IFNAR1</i>    | CCUACUUCCUCCAGUCUUUTT  | AAAGACUGGAGGAAGUAGGTT |
| <i>GBP2</i>      | GCCCUUUAGAAGAAGAUGUTT  | ACAUCUUCUUCUAAAGGGCTT |
| Negative control | UCCUCCGAACGUGUCACGUTT  | ACGUGACACGUUCGGAGAATT |

**Table S4** Primer sequences for mRNA expression analysis

| Source        | Gene          | Forward primer (5' - 3') | Reverse primer (5' - 3')  |
|---------------|---------------|--------------------------|---------------------------|
| Human         | <i>Bcl-xL</i> | AAAAGATCTTCCGGGGGCTG     | TCCACAAAAGTATCCTGTTCAAAGC |
|               | <i>MCL</i>    | CGACTTTTGGCCACCGGC       | TAGCCAGTCCCGTTTTGTCC      |
|               | <i>BAX</i>    | TCATGGGCTGGACATTGGAC     | GCGTCCCAAAGTAGGAGAGG      |
|               | <i>BAK</i>    | GGACCCATGCTGGAGTAAGAATAA | TTCTGCTGATGGCGGTAAA       |
|               | <i>VLA-6</i>  | GGCGGTGTTATGTCCTGAGTC    | AATCGCCCATCACAAAAGCTC     |
|               | <i>GPVI</i>   | TCCCGGCCATGAAGAGAAGT     | TTACGTCCCCTCCTGACGAC      |
|               | <i>CD62P</i>  | ACTGCCAGAATCGCTACACAG    | CACCCATGTCCATGTCTTATTGT   |
|               | <i>cGAS</i>   | ACATGGCGGCTATCCTTCTCT    | GGTTCTGGGTACATACGTGAAA    |
|               | <i>STING</i>  | CCAGAGCACACTCTCCGGTA     | CGCATTGGGGAGGGAGTAGTA     |
|               | <i>IFNAR1</i> | AACAGGAGCGATGAGTCTGTC    | TGCGAAATGGTGTAATGAGTCA    |
|               | <i>GBP2</i>   | ATTGTGGGCCTCTATCGCAC     | CCAGGTGAGGAGTTTGCCTT      |
|               | <i>GAPDH</i>  | AGCCTCAAGATCATCAGCAA     | GTCATGAGTCCTTCCACGATAC    |
|               | Mouse         | <i>IFN-β</i>             | TGGGTGGAATGAGACTATTGTTG   |
| <i>Bcl-xL</i> |               | GACAAGGAGATGCAGGTATTGG   | TCCCGTAGAGATCCACAAAAGT    |
| <i>MCL</i>    |               | AAAGGCGGCTGCATAAGTC      | TGGCGGTATAGGTCGTCCTC      |
| <i>BAX</i>    |               | CCGGCGAATTGGAGATGAACT    | CCAGCCCATGATGGTTCTGAT     |
| <i>BAK</i>    |               | GTGACCTGCTTTTTGGCTGAT    | GGTCTCTACGCAAATTCAGGG     |
| <i>GAPDH</i>  |               | AGGTCGGTGTGAACGGATTTG    | TGTAGACCATGTAGTTGAGGTCA   |

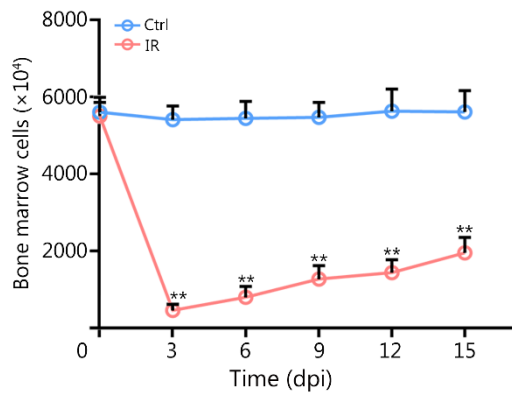

**Fig. S1** Number of bone marrow cells in mice at indicated dpi.  $n = 6$ . Data represent mean  $\pm$  standard deviation. \*\* $P < 0.01$ , compared to Ctrl. Two-tailed unpaired student's  $t$ -test. Ctrl control, IR ionizing radiation, dpi day post IR

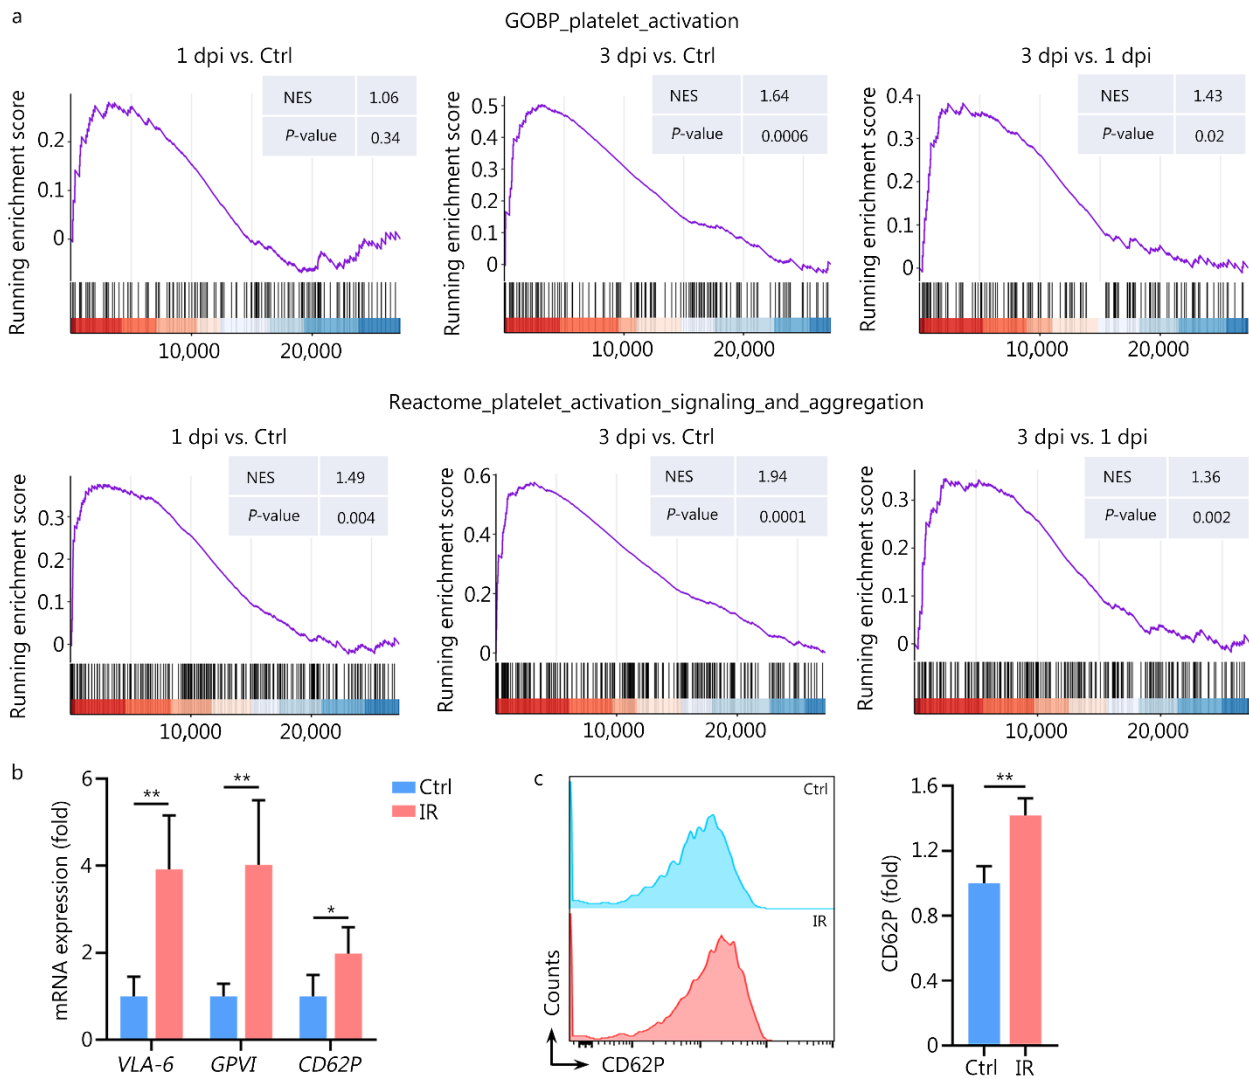

**Fig. S2** Platelets are molecularly and functionally hyperreactive post IR. **a** Gene set enrichment analysis of indicated gene sets in BM mMKs of mice at 1 and 3 dpi. **b** Relative mRNA expression of *VLA-6*, *GPVI*, and *CD62P* in Meg-01 cells at 3 dpi ( $n = 4$ ). **c** Flow cytometric analysis and quantification of CD62P expression in response to thrombin on PLPs from Meg-01 cultures at 3 dpi ( $n = 5$ ). Data represent mean  $\pm$  standard deviation. \* $P < 0.05$ , \*\* $P < 0.01$ , compared to Ctrl. Two-tailed unpaired student's  $t$ -test. mMK mature megakaryocyte, BM bone marrow, Ctrl control, IR ionizing radiation, dpi day post IR, VLA-6 integrin  $\alpha 6\beta 1$ , GPVI glycoprotein VI, PLP platelet-like particle, NES normalized enrichment score, GOBP gene ontology-biological process

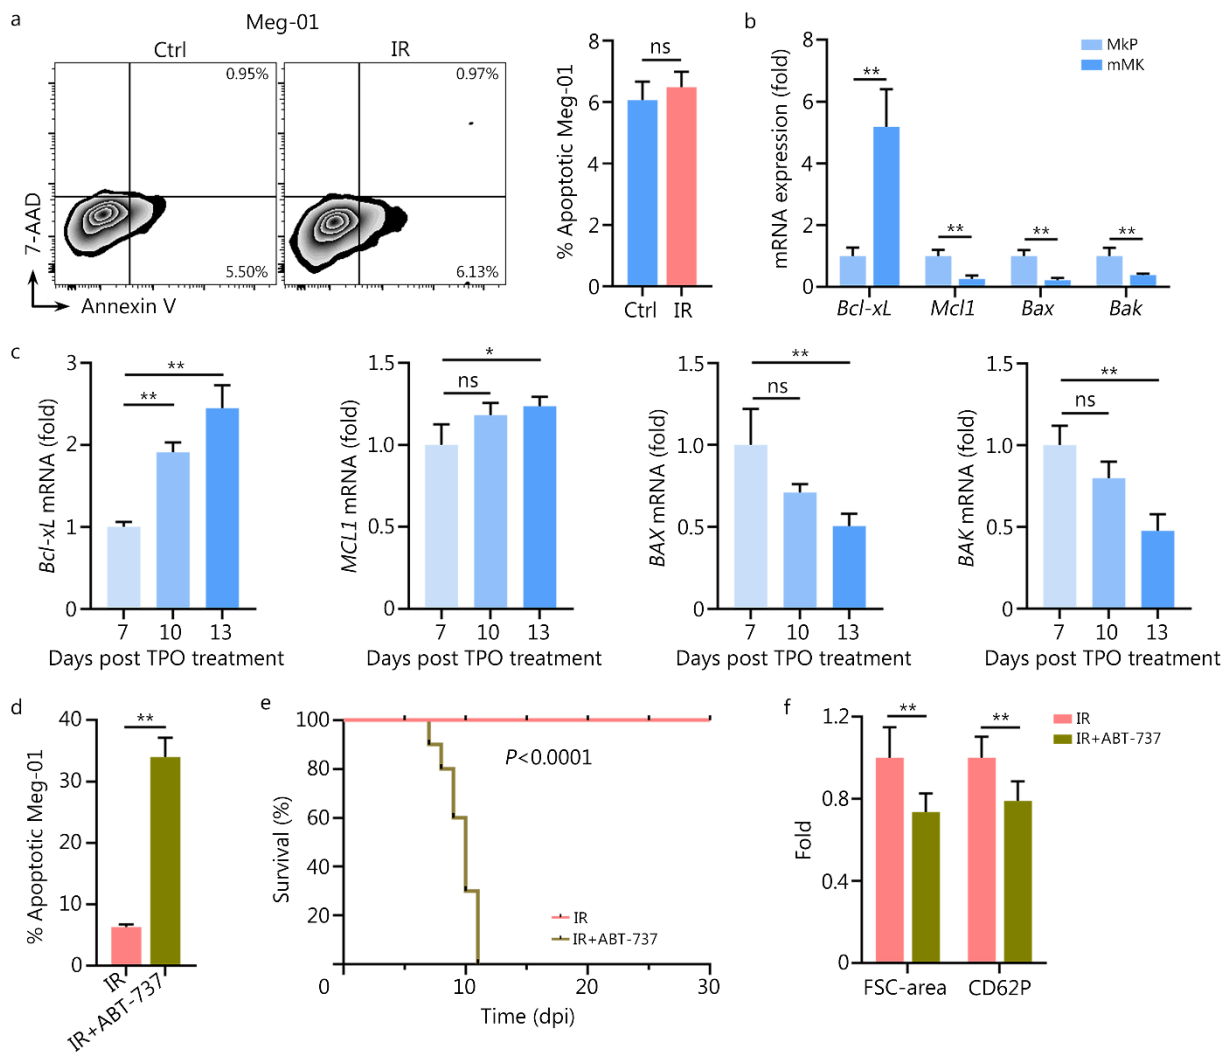

**Fig. S3** The inherently high pro-survival threshold confers radioresistance onto mMKs. **a** Flow cytometric analysis and quantification of Meg-01 apoptosis at 1 dpi ( $n = 5$ ). **b** Relative mRNA expression of pro-survival (*Bcl-xL* and *Mcl1*) and pro-apoptotic (*Bax* and *Bak*) Bcl-2 family in BM MkpPs and mMkPs of mice ( $n = 4$ ). **c** Relative mRNA expression of pro-survival (*Bcl-xL* and *MCL1*) and pro-apoptotic (*BAX* and *BAK*) Bcl-2 family in human primary MKs during TPO-induced maturation ( $n = 3$ ). **d** Flow cytometric quantification of Meg-01 apoptosis with or without ABT-737 treatment in vitro at 1 dpi ( $n = 5$ ). **e** Survival analysis of mice with or without ABT-737 treatment post IR ( $n = 10$ ). **f** Flow cytometric quantification of FSC-area and CD62P expression in response to thrombin of PLPs from Meg-01 cultures at 3 dpi ( $n = 5$ ). Data represent mean  $\pm$  standard deviation. ns, non-significance. \* $P < 0.05$ , \*\* $P < 0.01$ , compared to Mkp, Day 7, or IR. Two-tailed unpaired student's  $t$ -test unless stated otherwise. One-way analysis of variance (**b**). Log-rank test (**e**). MK megakaryocyte, mMk mature MK, Mkp MK progenitor, TPO thrombopoietin, Ctrl control, IR ionizing radiation, dpi day post IR, 7-AAD 7-amino-actinomycin D, PLP platelet-like particle, FSC forward scatter



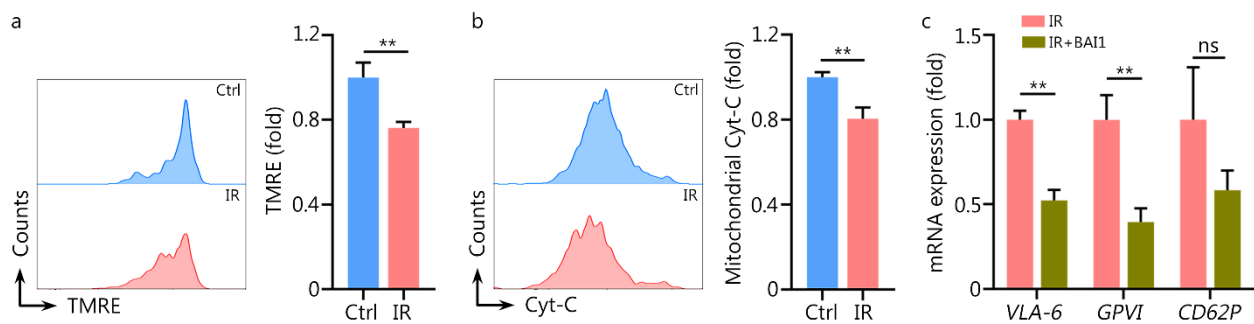

**Fig. S4** Minority MOMP is triggered in Meg-01 post IR. **a** Flow cytometric analysis and quantification of MMP in Meg-01 cells at 1 dpi ( $n = 5$ ). **b** Flow cytometric analysis and quantification of mitochondrial Cyt-C release in Meg-01 cells at 1 dpi. **c** Relative mRNA expression of *VLA-6*, *GPVI*, and *CD62P* in Meg-01 cells with or without BAI1 treatment at 3 dpi ( $n = 3$ ). Data represent mean  $\pm$  standard deviation. \*\* $P < 0.01$ , compared to Ctrl or IR. Two-tailed unpaired student's *t*-test. ns non-significance, Ctrl control, IR ionizing radiation, dpi day post IR, MOMP mitochondrial outer membrane permeabilization, MMP mitochondrial membrane potential, Cyt-C cytochrome C, TMRE tetramethylrhodamine ethyl ester, VLA-6 integrin  $\alpha\beta 1$ , GPVI glycoprotein VI

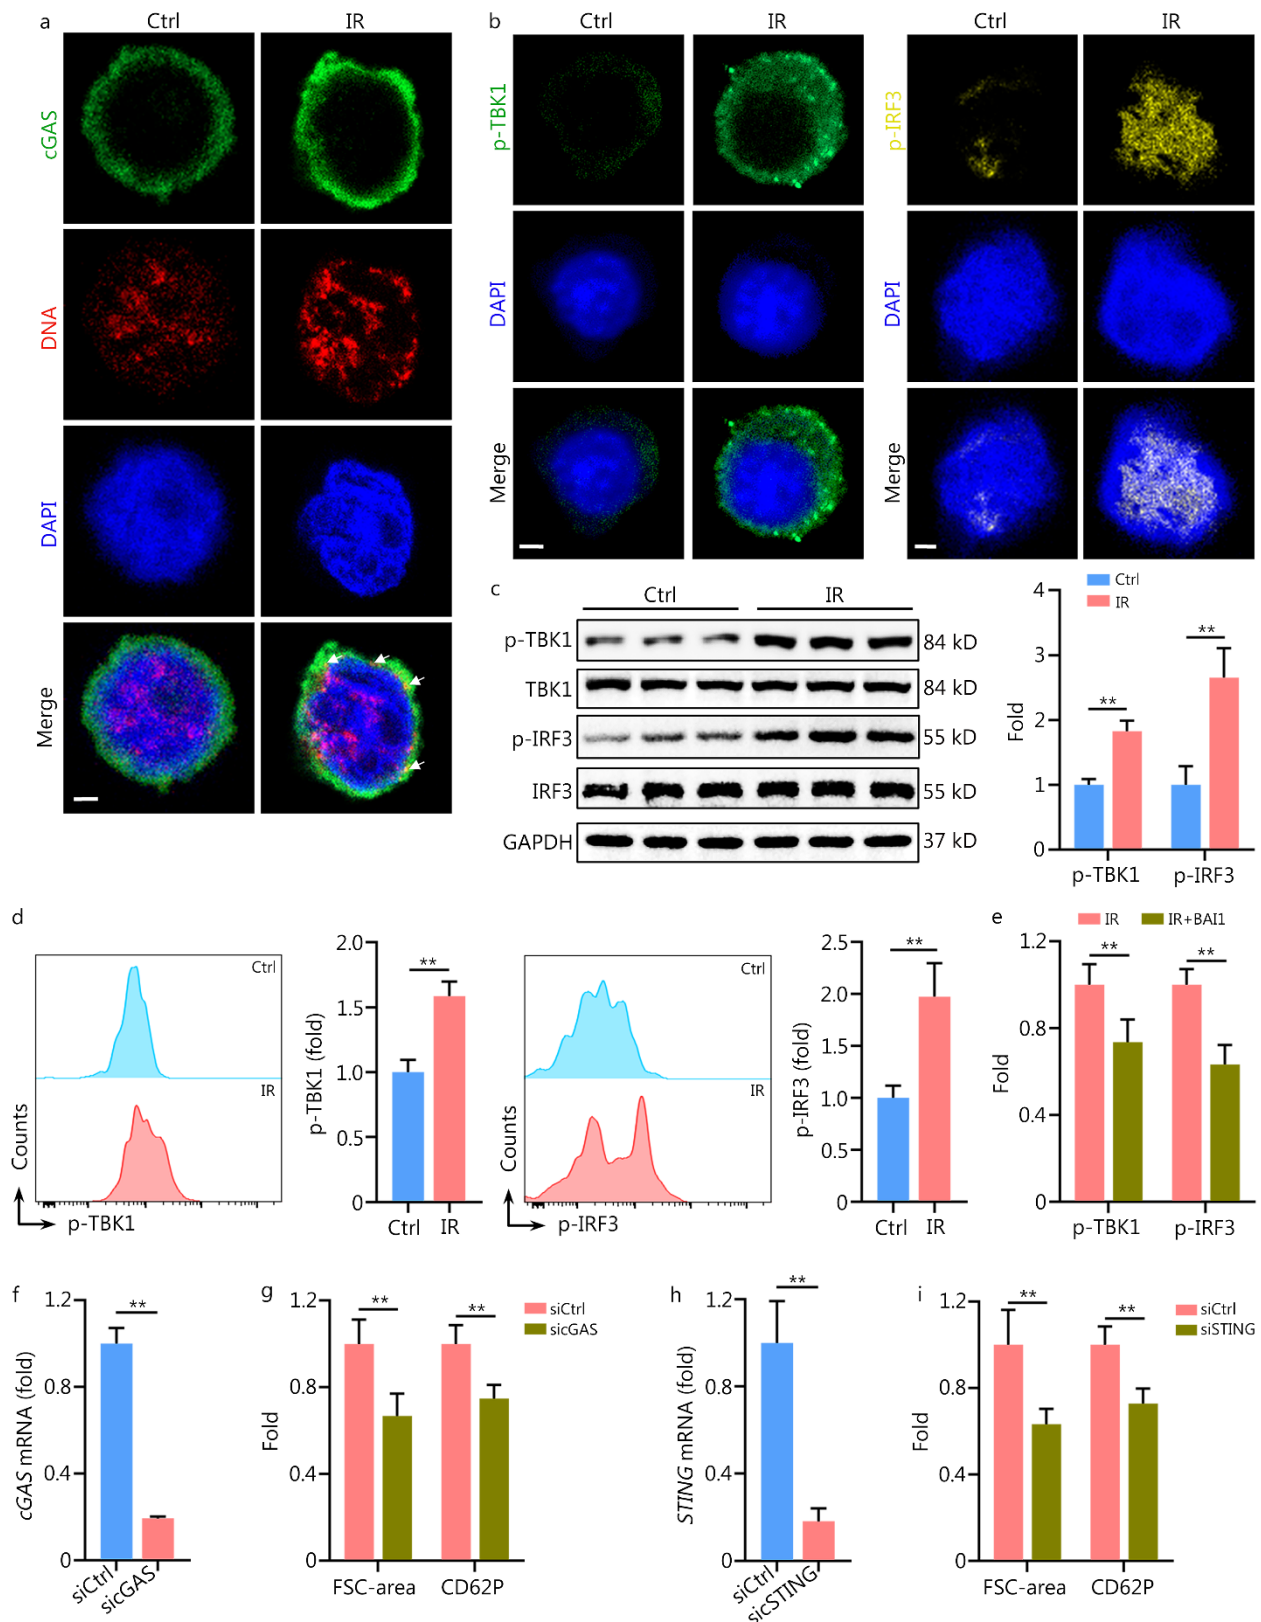

**Fig. S5** Minority MOMP stimulates cGAS/STING in Meg-01 post IR. **a** Colocalization of cytosolic DNA with cGAS in Meg-01 cells at 1 dpi was assessed by immunofluorescence staining with antibodies specific for DNA and cGAS. Scale bar = 20  $\mu$ m. The arrow indicates cGAS and DNA colocalization. **b** p-TBK1 and p-IRF3 expression in Meg-01 cells at 1 dpi was assessed by immunofluorescence staining. Scale bar = 20  $\mu$ m. **c** Western blotting analysis and quantification of p-TBK1 and p-IRF3 expression in Meg-01 cells at 1 dpi ( $n = 3$ ). **d** Flow cytometric analysis and

quantification of p-TBK1 and p-IRF3 expression in Meg-01 cells at 1 dpi ( $n = 5$ ). **e** Flow cytometric quantification of p-TBK1 and p-IRF3 expression in Meg-01 cells with or without BAI1 treatment at 1 dpi ( $n = 5$ ). **f** Relative *cGAS* mRNA expression in Meg-01 cells with or without sicGAS treatment ( $n = 3$ ). **g** Flow cytometric quantification of FSC-area and CD62P expression in response to thrombin of PLPs from Meg-01 cultures with or without sicGAS treatment at 3 dpi ( $n = 5$ ). **h** Relative *STING* mRNA expression in Meg-01 cells with or without siSTING treatment ( $n = 3$ ). **i** Flow cytometric quantification of FSC-area and CD62P expression in response to thrombin of PLPs from Meg-01 cultures with or without siSTING treatment at 3 dpi ( $n = 5$ ). Data represent mean  $\pm$  standard deviation.  $**P < 0.01$ , compared to Ctrl, IR or siCtrl. Two-tailed unpaired student's *t*-test. MOMP mitochondrial outer membrane permeabilization, cGAS cyclic GMP-AMP synthase, STING stimulator of interferon genes, Ctrl control, IR ionizing radiation, dpi day post IR, TBK1 TANK-binding kinase 1, IRF3 interferon regulatory factor 3, PLP platelet-like particle, FSC forward scatter, DAPI 4',6-diamidino-2-phenylindole, GAPDH glyceraldehyde-3-phosphate dehydrogenase, sicGAS siRNA of cGAS, siSTING siRNA of STING

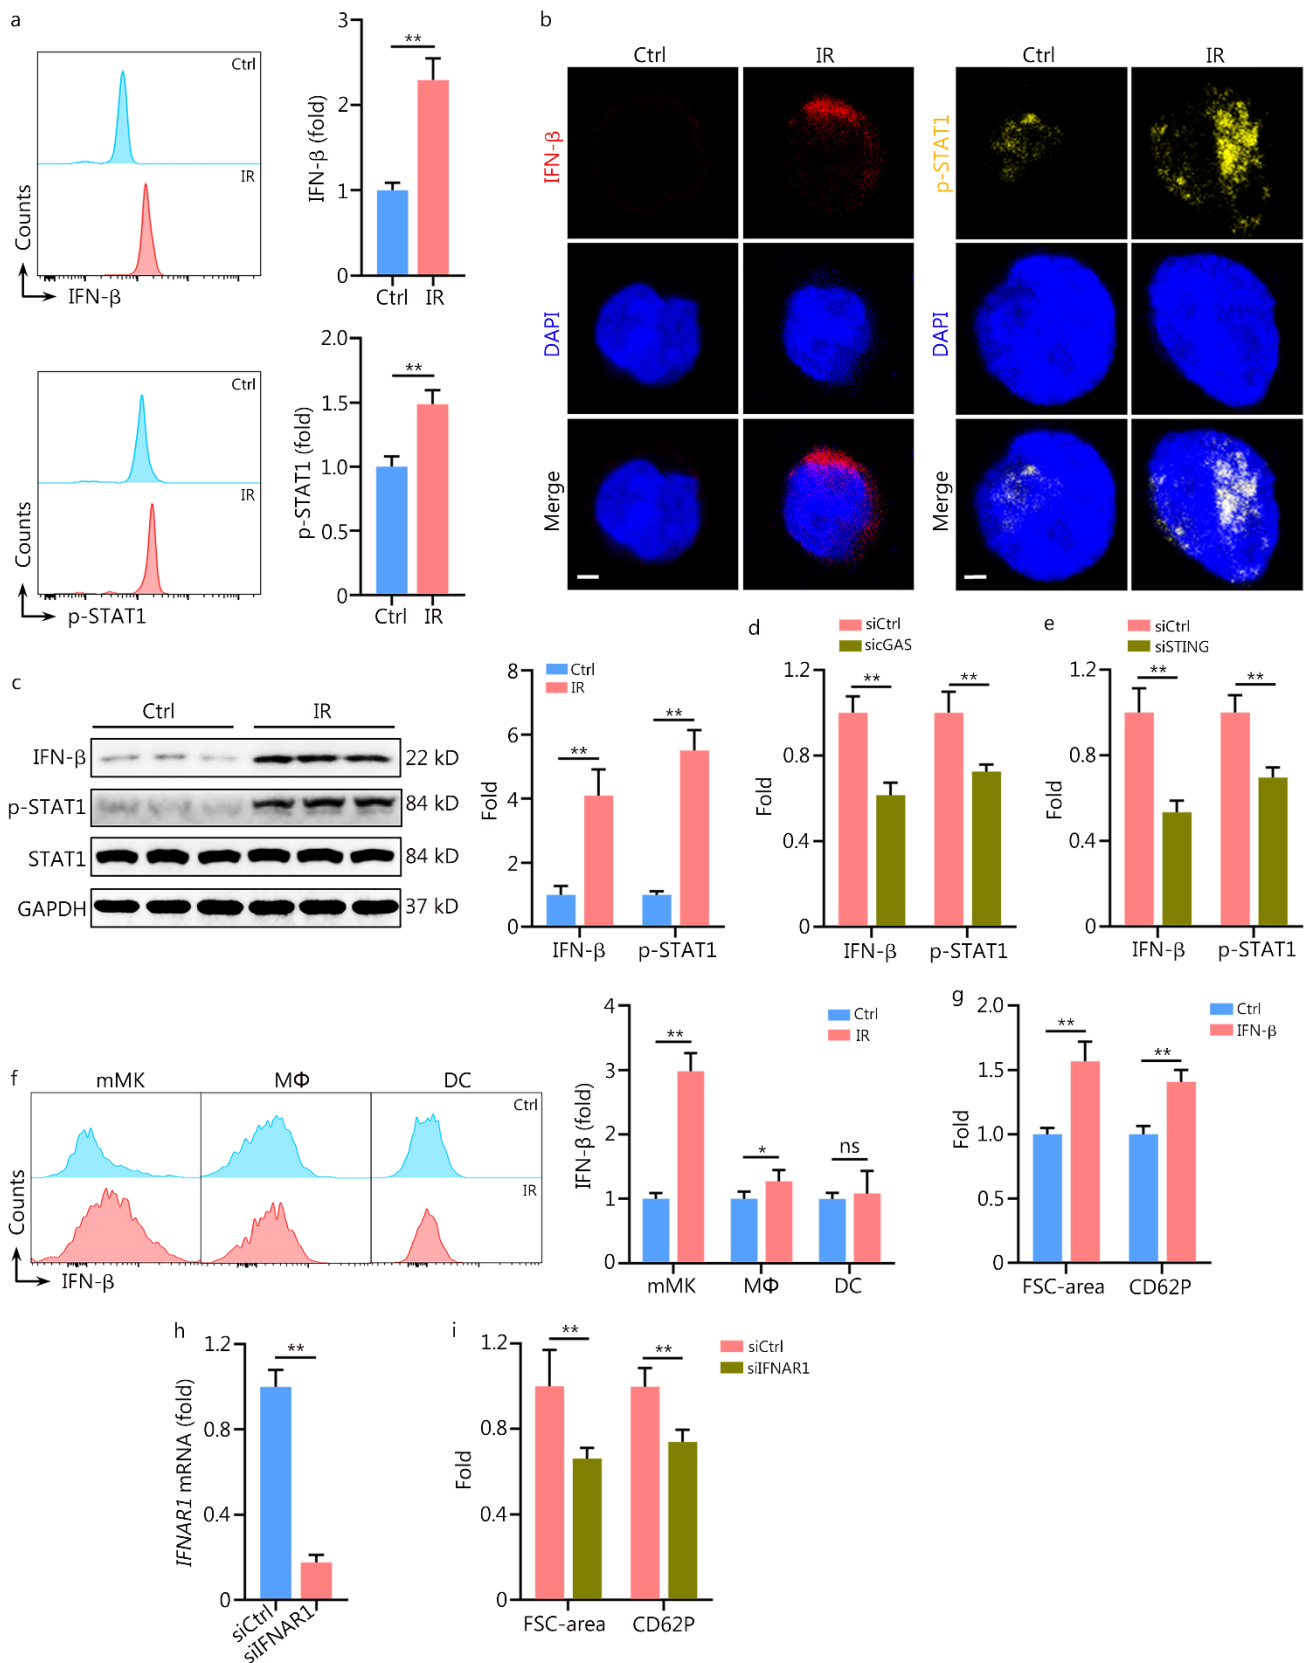

**Fig. S6** IFN- $\beta$  response is triggered in mMKs post IR. **a** Flow cytometric analysis and quantification of IFN- $\beta$  and p-STAT1 expression in Meg-01 cells at 1 dpi ( $n = 5$ ). **b** IFN- $\beta$  and p-STAT1 expression in Meg-01 cells at 1 dpi was assessed by immunofluorescence staining. Scale bar = 20  $\mu$ m. **c** Western blotting analysis and quantification of IFN- $\beta$  and p-STAT1 expression in Meg-01 cells at 1 dpi ( $n = 3$ ). **d** Flow cytometric quantification of IFN- $\beta$  and p-STAT1

expression in Meg-01 cells with or without sicGAS treatment at 1 dpi ( $n = 5$ ). **e** Flow cytometric quantification of IFN- $\beta$  and p-STAT1 expression in Meg-01 cells with or without siSTING treatment at 1 dpi ( $n = 5$ ). **f** Flow cytometric analysis and quantification of IFN- $\beta$  expression in mMK, M $\Phi$  and dendritic cell DC at 1 dpi ( $n = 5$ ). **g** Flow cytometric quantification of FSC-area and CD62P expression in response to thrombin of PLPs from Meg-01 cultures with or without IFN- $\beta$  treatment at 3 dpi ( $n = 5$ ). **h** Relative *IFNAR1* mRNA expression in Meg-01 cells with or without siIFNAR1 treatment ( $n = 3$ ). **i** Flow cytometric quantification of FSC-area and CD62P expression in response to thrombin of PLPs from Meg-01 cultures with or without siIFNAR1 treatment at 3 dpi ( $n = 5$ ). Data represent mean  $\pm$  standard deviation. \* $P < 0.05$ , \*\* $P < 0.01$ , compared to Ctrl or siCtrl. Two-tailed unpaired student's *t*-test. ns non-significance, IFN- $\beta$  interferon- $\beta$ , Ctrl control, IR ionizing radiation, dpi day post IR, STAT1 signal transducer and activator of transcription 1, cGAS cyclic GMP-AMP synthase, STING stimulator of interferon genes, sicGAS siRNA of cGAS, siSTING siRNA of STING, IFNAR1 IFN- $\alpha/\beta$  receptor 1, siIFNAR1 siRNA of IFNAR1, FSC forward scatter, PLP platelet-like particle, DAPI 4',6-diamidino-2-phenylindole, GAPDH glyceraldehyde-3-phosphate dehydrogenase, M $\Phi$  macrophage, DC dendritic cell

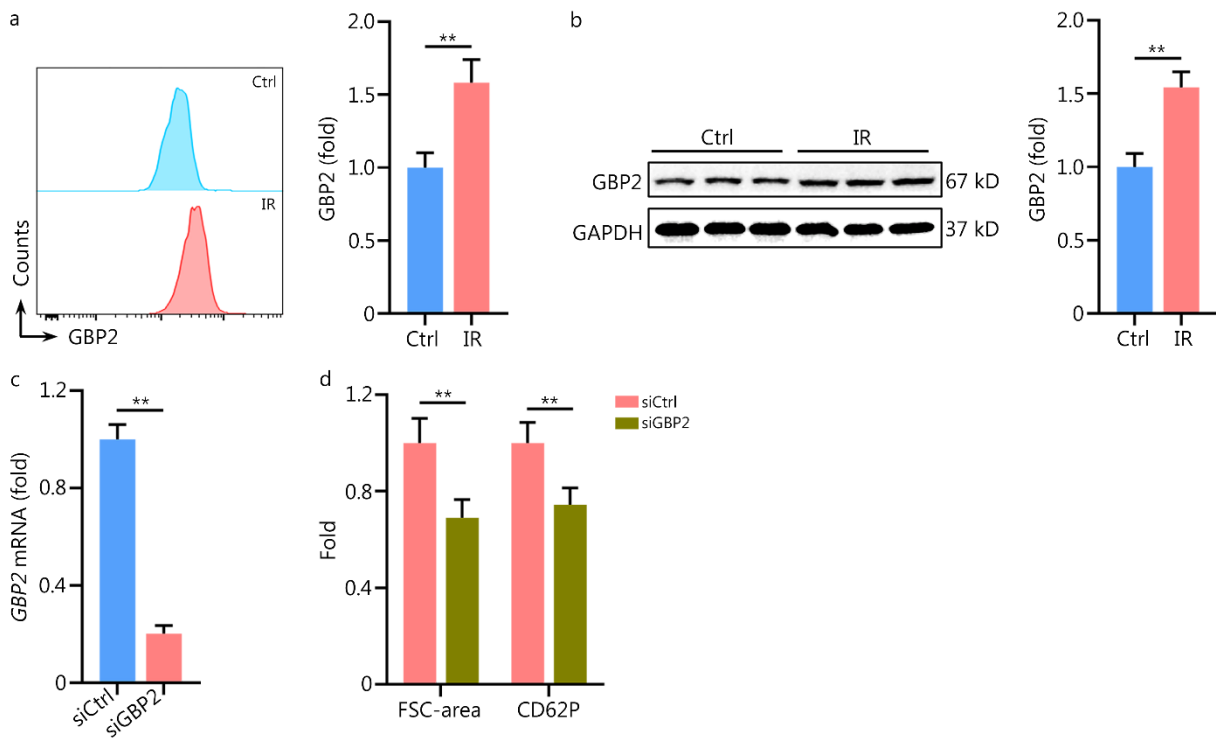

**Fig. S7** IFN-inducible gene GBP2 mediates production of large and hyperreactive platelets post IR. **a** Flow cytometric analysis and quantification of GBP2 expression in Meg-01 cells at 3 dpi ( $n = 5$ ). **b** Western blotting analysis and quantification of GBP2 expression in Meg-01 cells at 3 dpi ( $n = 3$ ). **c** Relative *GBP2* mRNA expression in Meg-01 cells with or without siGBP2 treatment ( $n = 3$ ). **d** Flow cytometric quantification of FSC-area and CD62P expression in response to thrombin of PLPs from Meg-01 cultures with or without siGBP2 treatment in the presence of IFN- $\beta$  ( $n = 5$ ). Data represent mean  $\pm$  standard deviation.  $*P < 0.05$ ,  $**P < 0.01$ , compared to Ctrl or siCtrl. Two-tailed unpaired student's *t*-test. IFN interferon, GBP2 guanylate-binding protein 2, Ctrl control, IR ionizing radiation, dpi day post IR, FSC forward scatter, PLP platelet-like particle, siGBP2 siRNA of GBP2, GAPDH glyceraldehyde-3-phosphate dehydrogenase

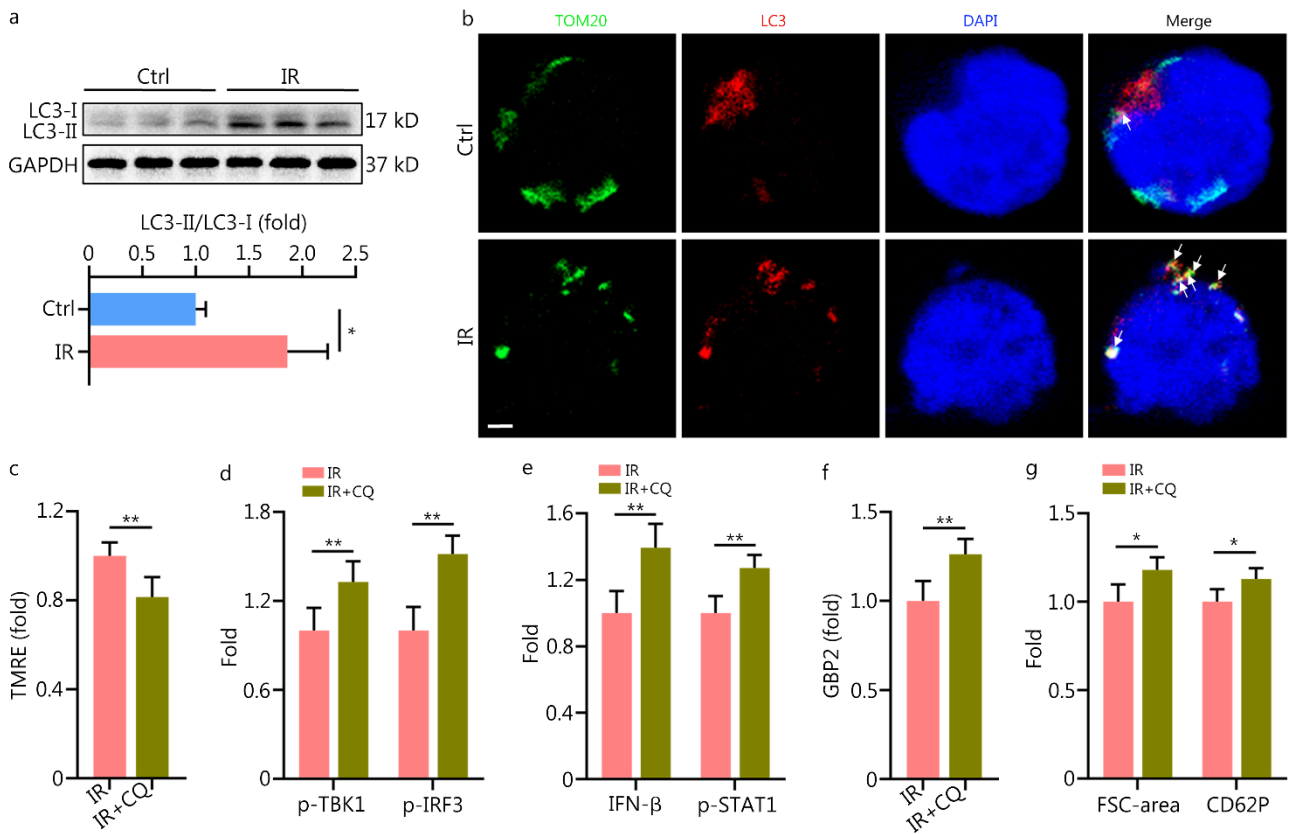

**Fig. S8** Autophagy restrains minority MOMP in Meg-01 post IR. **a** Western blotting analysis and quantification of LC3 lipidation in Meg-01 cells at 1 dpi ( $n = 3$ ). **b** Autophagic clearance of mitochondria in Meg-01 cells at 1 dpi was assessed by immunofluorescence staining with antibodies specific for LC3 and TOM20. Scale bar = 20  $\mu$ m. **c** Flow cytometric quantification of MMP in Meg-01 cells with or without CQ treatment at 1 dpi ( $n = 5$ ). **d** Flow cytometric quantification of p-TBK1 and p-IRF3 expression in Meg-01 cells with or without CQ treatment at 1 dpi ( $n = 5$ ). **e** Flow cytometric quantification of IFN- $\beta$  and p-STAT1 expression in Meg-01 cells with or without CQ treatment at 1 dpi ( $n = 5$ ). **f** Flow cytometric quantification of GBP2 expression in Meg-01 cells with or without CQ treatment at 3 dpi ( $n = 5$ ). **g** Flow cytometric quantification of FSC-area and CD62P expression in response to thrombin of PLPs from Meg-01 cultures with or without CQ treatment at 3 dpi ( $n = 5$ ). Data represent mean  $\pm$  standard deviation. \* $P < 0.05$ , \*\* $P < 0.01$ , compared to Ctrl or IR. Two-tailed unpaired student's  $t$ -test. MOMP mitochondrial outer membrane permeabilization, Ctrl control, IR ionizing radiation, dpi day post IR, LC3 microtubule-associated protein 1 light chain 3, LC3-I non-lipidized LC3, LC3-II lipidized LC3, TOM20 translocase of outer mitochondrial membrane 20, MMP mitochondrial membrane potential, CQ chloroquine, TBK1 TANK-binding kinase 1, IRF3 interferon regulatory factor 3, IFN- $\beta$  interferon- $\beta$ , STAT1 signal transducer and activator of transcription 1, GBP2 guanylate-binding protein 2, FSC forward scatter, PLP platelet-like particle, TMRE tetramethylrhodamine ethyl ester, DAPI 4',6-diamidino-2-phenylindole, GAPDH glyceraldehyde-3-phosphate dehydrogenase
